# Supplementary material
Source: PubMed Central journal article supplement (PMC8497665)
Supplement: 13280_2021_1570_MOESM1_ESM.pdf [file 13280_2021_1570_MOESM1_ESM.pdf]

*Ambio*

**Electronic Supplementary Material I**

*This supplementary material has not been peer reviewed*

Title of paper: **Impacts of environmental change on vegetation dynamics and biodiversity in Siberia**

Authors: Sergey N. Kirpotin , Terry V. Callaghan, Anna M. Peregon , Adrei S. Babenko, Daniil I. Berman, Nina A. Bulakhova , Arysia A. Byzaakay, Tatiana M. Chernykh, Vladislav Chursin, Elena A. Interesova, Sergey P. Gureev , Ivan A. Kerchev , Viacheslav I. Kharuk, Aldynai O. Khovalyg, Leonid A. Kolpashchikov , Svetlana A. Krivets , Zoya N. Kvasnikova, Irina V. Kuzhevskaya, Oleg E. Merzlyakov, Oleg G. Nekhoroshev, Viktor K. Popkov , Andrei I. Pyak , Tatyana O. Valevich , Igor V. Volkov , Irina I. Volkova

Title of ESM: **Additional references to support the case studies and details for references in online supplementary material II.**

**Introduction and major drivers of biodiversity change**

- Bazhenova O, Tyumentseva E (2015) Contemporary aeolian morphogenesis in semiarid landscapes of the intermountain depressions of Southern Siberia. *CATENA* 134:50-58  
doi:<https://doi.org/10.1016/j.catena.2015.02.006>
- Belonovskaya EA et al. (2016) The Greening of the Russian Arctic and Modern Trends in Changing its Biota. *News of the Russian Academy of Sciences Geographic Series: Natural Processes and the Dynamics of Geosystems* 3:28-39 (in Russian)
- Bowers SR (1993) Soviet and Post-Soviet Environmental Problems. *The Journal of social, political and economic studies* 18:131-159
- Callaghan TV et al. (2005) Arctic tundra and polar desert ecosystems. Cambridge Univ. Press, Cambridge
- Cohen J et al. (2014) Recent Arctic amplification and extreme mid-latitude weather. *Nature Geoscience* 7:627-637 doi:10.1038/ngeo2234
- Dai A, Song M (2020) Little influence of Arctic amplification on mid-latitude climate. *Nature Climate Change* 10:231-237 doi:10.1038/s41558-020-0694-3
- Dale V (1997) The Relationship Between Land-Use Change and Climate Change. *Ecological Applications* 7:753-769 doi:10.1890/1051-0761(1997)007[0753:trbluc]2.0.co;2
- Elmhagen B, Eriksson O, Lindborg R (2015) Implications of climate and land-use change for landscape processes, biodiversity, ecosystem services, and governance. *Ambio* 44 Suppl 1:S1-S5 doi:10.1007/s13280-014-0596-6
- EPA (2017) Climate Impacts on Ecosystems 2017, from [https://19january 2017 snapshot.epa.gov/climate-impacts/climate-impacts-ecosystems\\_.html](https://19january 2017 snapshot.epa.gov/climate-impacts/climate-impacts-ecosystems_.html).
- Federal-Law (2006) Forest Code of the Russian Federation. No. 200-FZ. <http://faolex.fao.org> (in Russian)
- Francis JA, Vavrus SJ, Cohen J (2017) Amplified Arctic warming and mid-latitude weather: new perspectives on emerging connections. *WIREs Climate Change* 8:e474 doi:10.1002/wcc.474
- Gutman G, Radeloff V (eds) (2017) Land-Cover and Land-Use Changes in Eastern Europe after the Collapse of the Soviet Union in 1991. Springer, Cham. doi:<https://doi.org/10.1007/978-3-319-42638-9>

- Hao R, Yu D, Liu Y, Liu Y, Qiao J, Wang X, Du J (2017) Impacts of changes in climate and landscape pattern on ecosystem services. *Science of the Total Environment* 579:718-728 doi:<https://doi.org/10.1016/j.scitotenv.2016.11.036>
- Jennings MD, Harris GM (2017) Climate change and ecosystem composition across large landscapes. *Landscape Ecology* 32:195-207 doi:10.1007/s10980-016-0435-1
- Kononova NK (2014) Features of the atmospheric circulation of the Northern hemisphere at the end of XX— Beginning of XXI century and their reflection in the climate. *Complex Systems* 2:11-35 (in Russian)
- Kononova NK (2015) Changes in the northern hemisphere atmospheric circulation in the 20th – 21st centuries and their consequences for climate. *Fundamental and applied climatology* 1:133-162
- Leontiev DF (2018) The natural environment under climate change and the reaction of individual representatives of biota. *Biological Sciences: Scientific Review* 3:18-22 (in Russian)
- Li M, Luo D (2019) Winter Arctic warming and its linkage with midlatitude atmospheric circulation and associated cold extremes: The key role of meridional potential vorticity gradient. *Science China Earth Sciences* 62:1329-1339 doi:10.1007/s11430-018-9350-9
- Liu J, Curry JA, Wang H, Song M, Horton RM (2012) Impact of declining Arctic sea ice on winter snowfall. *Proceedings of the National Academy of Sciences* 109:4074-4079 doi:10.1073/pnas.1114910109
- Liu Y, Xue Y (2020) Expansion of the Sahara Desert and shrinking of frozen land of the Arctic. *Scientific Reports* 10:4109 doi:10.1038/s41598-020-61085-0
- Locatelli B (2016) Ecosystem Services and Climate Change. In: Potschin M, Haines-Young R, Fish R, Turner RK (eds) *Routledge Handbook of Ecosystem Services*. Routledge, London and New York: 481-490.
- Lovejoy TE, Hannah L (2005) *Climate change and biodiversity*. Yale University Press, New Haven
- Luo D, Chen X, Dai A, Simmonds I (2018) Changes in Atmospheric Blocking Circulations Linked with Winter Arctic Warming: A New Perspective. *Journal of Climate* 31:7661-7678 doi:10.1175/jcli-d-18-0040.1
- Maslakov A, Kraev G (2016) Erodibility of permafrost exposures in the coasts of Eastern Chukotka. *Polar Science* 10:374-381 doi:<https://doi.org/10.1016/j.polar.2016.04.009>
- Mayer AL et al. (2016) How Landscape Ecology Informs Global Land-Change Science and Policy. *BioScience* 66:458-469 doi:10.1093/biosci/biw035
- Mokhov I, Akperov M, Prokofyeva M, Timazhev A, Lupo A, Treut H (2013) Blockings in the Northern hemisphere and Euro-Atlantic region: Estimates of changes from reanalysis data and model simulations. *Doklady Earth Sciences* 449 doi:10.1134/s1028334x13040144
- Mori M, Kosaka Y, Watanabe M, Nakamura H, Kimoto M (2019) A reconciled estimate of the influence of Arctic sea-ice loss on recent Eurasian cooling. *Nature Climate Change* 9:123-129 doi:10.1038/s41558-018-0379-3
- Mori M, Watanabe M, Shiogama H, Inoue J, Kimoto M (2014) Robust Arctic sea-ice influence on the frequent Eurasian cold winters in past decades. *Nature Geoscience* 7:869-873 doi:10.1038/ngeo2277
- Opdam P, Luque S, Jones KB (2009) Changing landscapes to accommodate for climate change impacts: a call for landscape ecology. *Landscape Ecology* 24:715-721 doi:10.1007/s10980-009-9377-1
- Osipov YS (2017) Eurasia. *Big Russian Encyclopedia*. 2004—2017. [in 35 vols.]. Great Russian Encyclopedia, Moscow
- Report (2019) National Report. Global Climate and Soil Cover of Russia: Desertification and Land Degradation, Institutional, Infrastructure, Technological Adaptation Measures (Agriculture and Forestry). vol 2. Moscow, MBA Publishing House LLC (in Russian)
- Screen JA, Simmonds I (2013) Exploring links between Arctic amplification and mid-latitude weather. *Geophysical Research Letters* 40:959-964 doi:10.1002/grl.50174
- Shepherd TG (2016) Effects of a warming Arctic. *Science* 353:989-990 doi:10.1126/science.aag2349
- Simmonds I, Govekar PD (2014) What are the physical links between Arctic sea ice loss and Eurasian winter climate? *Environmental Research Letters* 9:101003 doi:10.1088/1748-9326/9/10/101003

- Tepliyakov VK (1998) A History of Russian Forestry and Its Leaders. DIANE Publishing (in Russian),
- Tyrlis E, Hoskins BJ (2008) Aspects of a Northern Hemisphere Atmospheric Blocking Climatology. *Journal of the Atmospheric Sciences* 65:1638-1652 doi:10.1175/2007jas2337.1
- Walsh JE (2014) Intensified warming of the Arctic: Causes and impacts on middle latitudes. *Global and Planetary Change* 117:52-63 doi:https://doi.org/10.1016/j.gloplacha.2014.03.003

## Insects

- Bale JS et al. (2002) Herbivory in global climate change research: direct effects of rising temperature on insect herbivores. *Global Change Biology* 8:1-16 doi:10.1046/j.1365-2486.2002.00451.x
- Cammell ME, Knight JD (1992) Effects of Climatic Change on the Population Dynamics of Crop Pests. In: Begon M, Fitter AH, Macfadyen A (eds) *Advances in Ecological Research*, vol 22. Academic Press, pp 117-162. doi:https://doi.org/10.1016/S0065-2504(08)60135-X
- Debkov NM, Aleinikov AA, Gradel A, Bocharov AY, Klimova NV, Pudzha GI (2019) Impacts of the invasive four eyed fir bark beetle (*Polygraphus Proximus* Blandf.) on siberian fir (*Abies Sibirica* Ledeb.) forests In Southern Siberia. *Geography, Environment, Sustainability* 12:79-97 doi:doi:10.24057/2071-9388-2019-35
- DeLucia EH, Nabity PD, Zavala JA, Berenbaum MR (2012) Climate Change: Resetting Plant-Insect Interactions. *Plant Physiology* 160:1677-1685 doi:10.1104/pp.112.204750
- Harrington R, Stork N (1995) *Insects in Changing Environment*. 17th Symposium of the Royal Entomological Society. Academic Press, London
- Krasnikov SN, Krasnikova AS, Azhermacheva M (2010) Colorado beetle in Tomsk Oblast. *Ekology of Southern Siberia and adjacent territories Abakan, Khakass State University* 14:73 (in Russian)
- Lehmann P et al. (2020) Complex responses of global insect pests to climate warming. *Frontiers in Ecology and the Environment* 18:141-150 doi:10.1002/fee.2160
- Logan JA, Régnière J, Powell JA (2003) Assessing the impacts of global warming on forest pest dynamics. *Frontiers in Ecology and the Environment* 1:130-137 doi:10.1890/1540-9295(2003)001[0130:atiogw]2.0.co;2
- Mandelsham MY, Musolin DL Bark beetle *Ips amitinus* (Eichhoff, 1872) (Coleoptera: Curculionidae: Scolytinae) continues to expand its range in North Western and Northern Russia. In: *Monitoring and Biological control methods of woody plant pests and pathogens: from theory to practice.*, Krasnoyarsk, 2016. pp 129-130 (in Russian)
- Musolin DL, Saulich AK (2012) Responses of insects to the current climate changes: from physiology and behavior to range shifts. *Entomological Review* 92:715-740 doi:10.1134/s0013873812070019
- Parmesan C, Yohe G (2003) A globally coherent fingerprint of climate change impacts across natural systems. *Nature* 421:37-42 doi:10.1038/nature01286
- Pecl GT et al. (2017) Biodiversity redistribution under climate change: Impacts on ecosystems and human well-being. *Science* 355:eaai9214 doi:10.1126/science.aai9214
- Robinet C, Roques A (2010) Direct impacts of recent climate warming on insect populations. *Integrative Zoology* 5:132-142 doi:10.1111/j.1749-4877.2010.00196.x
- Saulich MI Spatial analysis of the Colorado beetle (*Leptinotarsa decemlineata* Say) area in the territory of Russia and neighboring states. In: *Contribution of entomology to agro-industrial complex, forestry and medicine*. Abstracts of XIII Congress of Russian Entomology Society, Krasnodar, 2007. pp 191-192 (in Russian)
- Urban MC et al. (2016) Improving the forecast for biodiversity under climate change. *Science* 353:aad8466 doi:10.1126/science.aad8466
- Voolma K et al. (2004) Distribution and spread of bark beetles (Coleoptera: Scolytidae) around the Gulf of Finland: a comparative study with notes on rare species of Estonia, Finland and North-Western Russia. *Entomologica Fennica* 15:198-210-198-210
- Walther G-R et al. (2002) Ecological responses to recent climate change. *Nature* 416:389-395 doi:10.1038/416389a

## **Fish**

- Adam AM (2013) Ecological monitoring. Report on the state and protection of the environment of the Tomsk region in 2012. Tomsk
- Balirwa JS et al. (2003) Biodiversity and Fishery Sustainability in the Lake Victoria Basin: An Unexpected Marriage? *BioScience* 53:703-715 doi:10.1641/0006-3568(2003)053[0703:bafsit]2.0.co;2
- Beyer K, Gozland RE, Copp GH (2010) Social network properties within a fish assemblage invaded by non-native sunbleak *Leucaspis delineatus*. *Ecological Modeling* 221: 2118–2122
- Burke JS, Bayne DR, Rea H (1986) Impact of silver and bighead carps on plankton communities of channel catfish ponds. *Aquaculture* 55:59-68
- Carlton JT (1989) Man's role in changing the face of the ocean: biological invasions and implications for conservation of near-shore environments. *Conservation Biology* 3:265–273
- Courchamp F, Fournier A, Bellard C, Bertelsmeier C, Bonnaud E, Jeschke J, Russell J (2016) Invasion Biology: Specific Problems and Possible Solutions. *Trends in Ecology & Evolution* 32 doi:10.1016/j.tree.2016.11.001
- Crivelli AJ (1995) Are fish introductions a threat to endemic freshwater fishes in the northern Mediterranean region? *Biological Conservation* 72:311-319 doi:https://doi.org/10.1016/0006-3207(94)00092-5
- Davis MA et al. (2011) Don't judge species on their origins. *Nature* 474:153-154 doi:10.1038/474153a
- Interesova EA, Yadrenkina EN, Savkin VM (2009) Spatial organization of the spawning grounds of cyprinidae and the regulated flow of the Upper Ob. *Journal of Ichthyology* 49:73-79 doi:10.1134/s0032945209010093
- Marchenko YY (2018) On the state and protection of the environment of the Novosibirsk region in 2017. Novosibirsk
- Petrachuk EU, Yankova NV (2013) Biology and dynamics of bream catches of the Middle and Lower Ob. In: Innovative development of the agricultural sector of the Northern Trans-Urals, vol 334-337 (in Russian?).
- Reshetnikov AN (2003) The introduced fish, rotan (*Perccottus glenii*), depresses populations of aquatic animals (macroinvertebrates, amphibians, and a fish). *Hydrobiologia* 510:83-90 doi:10.1023/B:HYDR.0000008634.92659.b4

## **Amphibians and Reptiles**

- Bazhenova O, Tyumentseva E (2015) Contemporary aeolian morphogenesis in semiarid landscapes of the intermountain depressions of Southern Siberia. *CATENA* 134:50-58 doi:https://doi.org/10.1016/j.catena.2015.02.006
- Bulakhova NA, Meshcheryakova EN, Berman DI Cryoresistance of three toad species from North Asia. In: In Abstract book of the 19th Ordinary General Meeting of SEH., Salzburg, Austria, 2017. p 186
- Iosif R, Papeş M, Samoilă C, Cogălniceanu D (2014) Climate-induced shifts in the niche similarity of two related spadefoot toads (genus *Pelobates*). *Organisms Diversity & Evolution* 14:397-408 doi:10.1007/s13127-014-0181-7
- Namzalov BB, Korolyuk AY (1991) Classification of steppe vegetation of Tuva and Southeast Altai. SB RAS, Novosibirsk
- Puzachenko YG, Kuzmin SL, Sandlerskiy RB (2011) Quantitative estimation of area parameters (with representatives of genus *Rana* as a case study). *Zhurnal obschey biologii* 72:339–354 (in Russian, English summary)

## Birds

- Adam AM, Toropov KV (2016) Birds of the southern taiga floodplain of the Ob. Literary Bureau, Tomsk
- Ananin AA (1995) The value of spring flood in the dynamics of the number and diversity of the population of birds of the Middle Ob Siberian Journal of Ecology 2:137–145
- Baranov PV (2007) The dynamics of the range of the raccoon dog (*Nyctereutes procyonoides*) in Transbaikalia at the turn of the XX-XXI centuries. Zoological Journal 86:894-896 (in Russian?)
- Bogdanov II (1998) Mammals of the Omsk region: textbook. Publishing house OmGPU, Omsk
- Devyashin MM, Gasilin VV, Kosintsev PA, Vasiliev SK (2017) The distribution of two species of badgers (*Meles Mustelidae*) in the southeast of Western Siberia in the Holocene. Zoological Journal 96:90-98 doi:10.7868 / S0044513417010056
- Devyashin MM, Kosintsev PA, Tyutenkov OY, Ovodov ND, Vasiliev SK (2016) The formation of modern ranges of martens (genus *Martes* Pinel 1792) in the southeast of Western Siberia. Zoological Journal 95:728-738 (in Russian?)
- Golovatin MG, Easter SP (2015) Northern find of an Asian badger in Western Siberia. Fauna of the Urals and Siberia 1:119-122 (in Russian ?)
- Gureev SP, Nekhoroshev OG, Mitchell PJ (2019) Spatial Heterogeneity of Bird Communities in the Natural Landscapes of the Southern Taiga of the Ob – Yenisei Interfluve and the Chulym River Valley (Tomsk Region). Paper presented at the Bio-Clim-Land. IOP Conference Series: Earth and Environmental Science.,
- Ivanova NV, Tyutenkov OY, Fadeev KD, Devyashin MM (2016) Features of the distribution and ecology of wild boar (*Sus Scrofa* L., 1758) in the southeastern part of Western Siberia (Tomsk Priobye). Principles of Ecology 5:53-54 (in Russian?)
- Kassal BY, Sidorov GN (2013) Distribution of the sable (*Martes zibellina*) and the pine marten (*Martes martes*) in Omsk oblast and biogeographic effects of their hybridization Russian Journal of Biological Invasions 4:105-115 doi:10.1134/s2075111713020070
- Kiryukhin ST (2012) Resettlement of a raccoon dog across the territory of the Novosibirsk Region. In: Kiryukhin ST, Telepnev VG, Kryuchkov VS, Kuznetsov EV (eds) Modern problems of nature management, hunting and animal husbandry. vol 1. p 400 (in Russian)
- Korobitsyn IG, Tyutenkov OY, Shcherbakova MM, Kokhonov EV, Terentyeva SP, Achimova SS (2014) About the distribution of coastal and pale swallows on the territory of the Tomsk Priobye. In: Materials for the distribution of birds in the Urals, in the Urals and Western Siberia, vol 19. Ekaterinburg, pp 70-72 (in Russian)
- Malkova MG (2003) Mammals (series “Animals of the Omsk Region”): a guide-determinant. Publisher-Polygraphist LLC, Omsk
- Melnikov YI (2015) Modern climatic trends in Central Asia and their influence on the dynamics of the bird fauna of Eastern Siberia. In: Ecosystems of Central Asia in modern conditions of socio-economic development., vol 1. Ulan-Bator, pp 333-337 (in Russian)
- Melnikov YI et al. (2018) The fauna of birds of Eastern Siberia and the features of its dynamics (late XIX - early XXI centuries). Paper presented at the Modern problems of ornithology in Siberia and Central Asia: Materials of the VI International Ornithological,
- Milovidov SP, Nekhoroshev OG (2007) The dynamics of the bird population of Tomsk Vestnik of Tomsk State University (Series Biology) 300:182-185 (in Russian)
- Nasimovich AA (1985) Raccoon dog. In: Arctic fox, fox, raccoon dog. Moscow, pp 116-145 (in Russian)
- Novikov VP (2015) On the position of the southern boundary of reindeer range in the taiga zone of Western Siberia. Russian Journal of Ecology 46:450-455 doi:10.1134/s1067413615040141
- Pankova NL (2015) Meet raccoon dogs in the nature park "Samarovsky Chugas" (Khanty-Mansi Autonomous Okrug - Yugra). In: Fauna of the Urals and Siberia., vol 1. pp 148-150 (in Russian)
- Pavlov MP (1974) Acclimatization of hunting and fishing animals and birds in the USSR. vol 2. Volga-Vyatka Prince Publishing House, Kirov

- Shcherbakova MM, Korobitsyn IG, Tyutenkov OY, Golovneva AA, V. SM (2020) New data on the phenology and reproduction of coastal *Riparia riparia* and pale *R. diluta* swallows in the southeast of Western Siberia *Russian Journal of Ornithology* 29:2107-2110 (in Russian)
- Starikov VP (2003) *Mammals of the Khanty-Mansiysk Autonomous Okrug (distribution, ecology, practical value): textbook*. State Unitary Enterprise Khanty-Mansi Autonomous Okrug Surgut Printing House, Surgut
- Toropov KV, Shor EL (2012) *Birds of the southern taiga of Western Siberia: 25 years later*. Science Center, Novosibirsk
- Tyutenkov OY Gyps Fulvus griffon vulture (Hablizl, 1783) flies into the taiga zone of Western Siberia. In: Popov VV (ed) *Modern problems of ornithology in Siberia and Central Asia: Materials of the VI International Ornithological Conference, Irkutsk, 2018*. INTSHT, pp 232-234 (in Russian)
- Tyutenkov OY, Budz AV (2014) Dynamics of the range and occurrence of pine marten (*Martes martes* L.) in the southeast of the forest zone of Western Siberia. *Uspekhi Zhizn (Life Sciences)* 9:150-152 (in Russian)

## Mammals

- Banfield AWI (1956) The caribou crisis. "The Beaver". vol 3. Spring,
- Bjorkman AD et al. (2018) Plant functional trait change across a warming tundra biome *Nature* 562:57-62 doi:10.1038/s41586-018-0563-7
- Devyashin MM, Gasilin VV, Kosintsev PA, Vasiliev SK (2017) The distribution of two species of badgers (*Meles Mustelidae*) in the southeast of Western Siberia in the Holocene. *Zoological Journal* 96:90-98 doi:10.7868 / S0044513417010056
- Kassal BY, Sidorov GN (2013) Distribution of the sable (*Martes zibellina*) and the pine marten (*Martes martes*) in Omsk oblast and biogeographic effects of their hybridization *Russian Journal of Biological Invasions* 4:105-115 doi:10.1134/s2075111713020070
- Kelsall JP (1968) The migratory barren-ground caribou of Canada. *Wildlife Management Bulletin, Ottawa* 1:340
- Kolpashchikov LA (1982) Wild reindeer of Taimyr (features of ecology, conservation and rational use). Abstract of PhD thesis.,
- Kolpashchikov LA, Bondar MG, Mikhailov VV (2019) The modern history of the Taimyr population of wild reindeer: dynamics, management, threats and conservation methods. *Proceedings of the Karelian Scientific Center of the Russian Academy of Sciences* 11:5-20 (in ERussian)
- Kolpashchikov LA, Mikhailov VV (2001) Natural mortality of deer of the Taimyr population. *Zoological journal* 4:494-493 (in Russian)
- Lavrinenko IA, Lavrinenko OA (2013) The effect of climate change on the vegetation cover of the islands of the Barents Sea. *Proceedings of Karelian Scientific Center RAS* 6:4-16 (in Russian)
- Makeev VM, Klovov KB, Kolpashchikov LA, Mikhailov VV (2014) *Reindeer in a changing climate*. Lemma, St. Petersburg
- Malkova MG (2003) *Mammals (series "Animals of the Omsk Region"): a guide-determinant*. Publisher-Polygraphist LLC, Omsk
- Mikhailov VV (2013) Model for controlling the heat balance of a reindeer as an element of integrated monitoring software. *Proceedings of SPIIRAS, St Petersburg* 13:255-276 (in Russian)
- Mikhailov VV, Kolpashchikov LA (2012) Three stages in the documented history of the Taimyr population of wild reindeer. *Zoological Journal* 91:486-492 (in Russian)
- Nasimovich AA (1985) Raccoon dog. In: *Arctic fox, fox, raccoon dog*. Moscow, pp 116-145 (in Russian)
- Pankova NL (2015) Meet raccoon dogs in the nature park "Samarovsky Chugas" (Khanty-Mansi Autonomous Okrug - Yugra). In: *Fauna of the Urals and Siberia.*, vol 1. pp 148-150 (in Russian)
- Pavlov BM, Borjonov BB, Zyryanov VA, Kuksov VA, Yakushkin GD On the migration of wild reindeer in Taimyr. In: *Proceedings of NIISH of the Far North, Krasnoyarsk, 1969*. pp 158-163 (in Russian)

Yakushkin GD, Zyryanov VA, Kuksov VA, Pavlov BM (1971) Features of the placement of wild reindeer of the Taimyr population on summer pastures. In: Problems of the hunting economy of the Krasnoyarsk Territory. Krasnoyarsk, pp 102-104 (in Russian)

## Vegetation

- Bazha SN et al. (2015) Invasive Successions as the Indicator of Desertification of Dry Steppe by Way of Example of Central Mongolia. *Russian Journal of Biological Invasions* 6:223-237 doi:10.1134/s2075111715040025
- Bezuglova OS, Golozubov OM, Poluyan DI (2015) Regional features of desertification processes in Rostov oblast. *Arid Ecosystems* 5:10-13 doi:10.1134/s2079096115010035
- Butterbach-Bahl K, Kögel-Knabner I, Han X (2011) Steppe ecosystems and climate and land-use changes—vulnerability, feedbacks and possibilities for adaptation. *Plant and Soil* 340:1-6 doi:10.1007/s11104-010-0651-4
- Callaghan T, Velichko A, Borisova O (2011) Tundra in a changing climate. *Bulletin of the Russian Academy of Sciences Geographic Series: Theory and Social Functions of Geography* 4:4-18 doi:10.24057/2071-9388-2011-4-3-4-18
- Gunin PD et al. (2015) Regional features of desertification processes of ecosystems on the border of the Baikal basin and Central Asian internal drainage basin. *Arid Ecosystems* 5:117-133 doi:10.1134/s2079096115030063
- Jenkins LK et al. (2020) Satellite-based decadal change assessments of pan-Arctic environments. *Ambio* 49:820-832 doi:10.1007/s13280-019-01249-z
- Macias-Fauria M, Forbes BC, Zetterberg P, Kumpula T (2012) Eurasian Arctic greening reveals teleconnections and the potential for structurally novel ecosystems. *Nature Climate Change* 2:613-618 doi:10.1038/nclimate1558
- Makunina NI (2011) Altitudinal zonality of the southern macro slope of the West and East Tannu-Ola: the main types of plant communities *Siberian Journal of Ecology* 3:357-377 (in Russian)
- Makunina NI (2014) Mountain forest-steppe of South-east Altai and South-West Tuva *Vegetation of Russia* 24:86-100 (in Russian)
- Manasypov RM, Shirokova LS, Soulsby C, Tetzlaff D (2018) High riverine CO<sub>2</sub> emissions at the permafrost boundary of Western Siberia. *Nature Geoscience* 11:825-829 doi:10.1038/s41561-018-0218-1
- Martin AC, Jeffers ES, Petrokofsky G, Myers-Smith I, Macias-Fauria M (2017) Shrub growth and expansion in the Arctic tundra: an assessment of controlling factors using an evidence-based approach. *Environmental Research Letters* 12:085007 doi:10.1088/1748-9326/aa7989
- Namzalov BB (1994) *Steppes of southern Siberia*. Novosibirsk: Ulan-Ude
- Namzalov BB, Korolyuk AY (1991) *Classification of steppe vegetation of Tuva and Southeast Altai*. SB RAS, Novosibirsk
- Piao S, Friedlingstein P, Ciais P, Viogy N, Demarty J (2007) Growing season extension and its impact on terrestrial carbon cycle in the Northern Hemisphere over the past 2 decades. *Global Biogeochemical Cycles* 21 doi:10.1029/2006gb002888
- Serikova S et al. (2018) High riverine CO<sub>2</sub> emissions at the permafrost boundary of Western Siberia. *Nature Geoscience* 11:825-829 doi:10.1038/s41561-018-0218-1
- Sobolevskaya KA (1950) *Vegetation of Tuva*. ZSF AN SSSR, Novosibirsk
- WWF (2011) *Climate change and its impacts on ecosystems, populations and economies Russian part of Altae-Sayan ecoregion: assessment report 2011*. Moscow
- Zhu Z et al. (2016) Greening of the Earth and its drivers. *Nature Climate Change* 6:791-795 doi:10.1038/nclimate3004
